# Supplementary material
Source: PubMed Central journal article supplement (PMC356945)
Supplement: pnas_0306484101_3.pdf [file pnas_0306484101_3.pdf]

## Supporting Text

### Enhancer Mutagenesis

This method is relevant for the results shown in Fig. 6B. The enhancer sequence was mutagenized with Splicing by Overlap Extension (SOE) (1). The following mutagenic primers were used for the first PCR. Strong enhancer: Ss, 5'-CAAAGGTCATTGCACTAAAATGGTGATAATGTTTCCATTGATGCACTATATTGGTGC-3', and As, 5'-CAAAGGTCATTGCACTAAAA TGGTGATAATGTTTCCATTGATGCACTATATTGGTGC-3'. Weak enhancer: Sw, 5'-GCTTAATGTTTCCATTGATGCACCATATTAAGATAACATTCACATCGTGG TGCAGCCC-3', and Aw, 5'-GCTGCACCACGATGTGAATGTTATCTTAAT ATGGTGCATCAATGGAAACATTAAGCACC-3'. Outside primers were the following: F, 5'-GCAGCAAGCGGTCCACGCTGG-3', and R, 5'-GCATCACCTTCACCCTCTCC-3'.

PCR was carried out with (i) Ss/R and (ii) As/F for the strong enhancer and (iii) Sw/R and (iv) Aw/F for the weak enhancer. The following components were used for the PCR reactions: 200 nM concentration of each primer, 1 ng/ $\mu$ l template (pGlnAp<sub>2</sub>GFP<sub>mut3.1</sub>), 0.2 mM dNTP, and 50 milliunits/ml *Taq* polymerase. Thermal cycling parameters were 95°C for 2 min (one cycle), 95°C for 30 s, 58°C for 30 s, 72°C for 1.5 min (24 cycles), 72°C for 10 min (one cycle). The PCR products were gel-purified (Zymoclean, Zymo Research, Orange, CA), and 0.24 ng/ $\mu$ l Ss/R and Sw/R and 0.06 ng/ $\mu$ l As/F and Aw/F were used as templates for the second PCR. Concentrations were the same as in the first PCR, and thermal-cycling parameters were 95°C for 2 min (one cycle), 95°C for 30 s, 65°C for 45 s, 72°C for 1.33 min (six cycles), 72°C for 5 min (one cycle), 95°C for 30 s, 53°C for 30 s, 72°C for 1.25 min (25 cycles), 72°C for 5 min (one cycle). The primers F and R were added during the incubation at 72°C for 5 min. The products of the assembly PCR were purified and used as megaprimers for Megawhop (2). PCR conditions were the following: 12 ng/ $\mu$ l megaprimer, 1 ng/ $\mu$ l template (pGlnAp<sub>2</sub>GFP<sub>mut3.1</sub>), 0.2 mM dNTP, 75 milliunits/ml pfu-turbo. Thermal cycling parameters were 95°C for 1.5 min (one cycle), 95°C for 30 s, 55°C for 30 s, 68°C for 9 min (24 cycles), 68°C for 30 min (one cycle). After addition of 400 units/ml *DpnI*, the reaction solution was incubated at 37°C for 2 h. The reaction solution was used for the transformation of competent BW18793. Single colonies were picked and cultivated. Plasmids were prepared from these cultures and sequenced.

### QS Experiment with a Degradable Reporter Protein

BW18793 carrying pGlnAp<sub>2</sub>GFP<sub>AAV</sub> was used in a QS experiment (Fig. 7). This control experiment verifies that the behavior of the QS strain is not sensitive to the half-life of the reporter protein.

### Mathematical Model

For all intracellular species, the mole balance begins with,

$$\frac{d(nVc \cdot X)}{dt} = nVc(r_{\text{generation}} - r_{\text{consumption}}), \quad [1]$$

where  $n$  is the number of cells,  $Vc$  is the volume of individual cells,  $X$  is the molar concentration of the species of interest,  $r_{\text{generation}}$  and  $r_{\text{consumption}}$  are the rates of generation and consumption of  $X$ , respectively. The left-hand side of the equation can be expanded by chain rules to give

$$\frac{d(nVc \cdot X)}{dt} = X \frac{dnVc}{dt} + nVc \frac{dX}{dt} = nVc(r_{\text{generation}} - r_{\text{consumption}}). \quad [2]$$

Subtracting  $X \frac{dnVc}{dt}$  from both sides, then dividing both sides by  $nVc$  yields

$$\frac{dX}{dt} = r_{\text{generation}} - r_{\text{consumption}} - X \left( \frac{1}{nVc} \frac{dnVc}{dt} \right), \quad [3]$$

where the term in parentheses is, by definition, equal to the specific growth rate of the cells,

$$\frac{1}{nVc} \frac{dnVc}{dt} = \mu. \quad [4]$$

Thus, Eq. 1 becomes

$$\frac{dX}{dt} = r_{\text{generation}} - r_{\text{consumption}} - \mu X. \quad [5]$$

For extracellular species, the mole balance is

$$\frac{d([Vt - nVc] \cdot X)}{dt} = (Vt - nVc)(r_{\text{generation}} - r_{\text{consumption}}), \quad [6]$$

where  $V_t$  is the total culture volume. Expand by chain rules and perform algebraic rearrangements, and Eq. 6 thus becomes

$$\frac{dX}{dt} = r_{\text{generation}} - r_{\text{consumption}} + X \left( \frac{1}{V_t - nV_c} \frac{dnV_c}{dt} \right). \quad [7]$$

Multiply the term in parentheses with  $nV_c/nV_c$  and use of Eq. 4 yields

$$\frac{dX}{dt} = r_{\text{generation}} - r_{\text{consumption}} + X \mu \left( \frac{nV_c}{V_t - nV_c} \right) \quad [8]$$

For species involved in diffusion across the cell membrane, the volume fraction of the cells needs to be accounted for. Hence, for the intracellular component, the mole balance is

$$\frac{d(nV_c \cdot X_i)}{dt} - (nV_c)(r_{\text{generation}} - r_{\text{consumption}}) = -na_s g_m (X_i - X_e) \quad [9]$$

and for the extracellular counterpart, the mole balance is

$$\frac{d((V_t - nV_c) \cdot X_e)}{dt} - (V_t - nV_c)(r_{\text{generation}} - r_{\text{consumption}}) = na_s g_m (X_i - X_e), \quad [10]$$

where  $a_s$  is the surface area of the individual cell and  $g_m$  is the mass transfer coefficient of acetic acid through the membrane. According to the reaction scheme depicted in Fig. 8 and the derivation above, the differential equations for each species are as follows:

$$\frac{dOAc_i^-}{dt} = v_1 + v_2 - v_3 - \mu(OAc_i^-) \quad [11a]$$

$$\frac{dHOAc_i}{dt} = \frac{-v_4}{V_c} + v_3 - \mu(HOAc_i) \quad [11b]$$

$$\frac{dHOAc_e}{dt} = \frac{v_4}{Vt - nVc} + v_5 + \mu \frac{nVc}{Vt - nVc} (HOAc_e) \quad [11c]$$

$$\frac{dOAc_e^-}{dt} = -v_5 + \mu \frac{nVc}{Vt - nVc} (OAc_e^-) \quad [11d]$$

$$\frac{dAcP}{dt} = -v_2 - v_6 - \mu (AcP) \quad [11e]$$

$$\frac{dn}{dt} = \mu n \quad [11f]$$

$$\frac{dmgfp}{dt} = v_7 - v_8 - \mu (mgfp) \quad [11g]$$

$$\frac{dGfp}{dt} = v_9 - v_{10} - \mu (Gfp). \quad [11h]$$

Definitions each variable and velocity terms are listed in Tables 1 and 2 respectively. The definitions and values of each parameter are given in Table 3.

1. Horton, R. M. (1995) *Mol. Biotechnol.* **3**, 93-99.
2. Porter, S. C., North, A. K., Wedel, A. B. & Kustu, S. (1993) *Genes Dev.* **7**, 2258-2273.
