# Supplementary material
Source: PubMed Central journal article supplement (PMC356945)
Supplement: pnas_0306484101_6.pdf [file pnas_0306484101_6.pdf]

**Table 1. Definitions of variables**

| Variables | Definitions               |
|-----------|---------------------------|
| $OAc_i^-$ | Intracellular acetate     |
| $HOAc_i$  | Intracellular acetic acid |
| $OAc_e^-$ | Extracellular acetate     |
| $HOAc_e$  | Extracellular acetic acid |
| $AcP$     | Acetyl phosphate          |
| $n$       | Number of cells           |
| $mgfp$    | mRNA of gfp               |
| $Gfp$     | GFP protein               |
| $t$       | Time                      |
