# Supplementary material
Source: PubMed Central journal article supplement (PMC356945)
Supplement: pnas_0306484101_7.pdf [file pnas_0306484101_7.pdf]

**Table 2. Definitions of velocities**

| Velocities | Definition                                                                                    |
|------------|-----------------------------------------------------------------------------------------------|
| $v_1$      | $k$                                                                                           |
| $v_2$      | $\left( \frac{V_1 AcP}{Km1 + AcP} - \frac{V_2 OAc_i^-}{Km2 + OAc_i^-} \right) \frac{ack}{Vc}$ |
| $v_3$      | $k_f(OAc_i^-)(H_i^+) - k_{rev}HOAc_i$                                                         |
| $v_4$      | $na_s g_m (HOAc_i - HOAc_e)$                                                                  |
| $v_5$      | $k_f(OAc_e^-)(H_e^+) - k_{rev}HOAc_e$                                                         |
| $v_6$      | $k_d AcP$                                                                                     |
| $v_7$      | $\frac{\alpha(AcP/K_l)^h}{1 + (AcP/K_l)^h} + \alpha_o$                                        |
| $v_8$      | $\gamma(mgfp)$                                                                                |
| $v_9$      | $\theta(mgfp)$                                                                                |
| $v_{10}$   | $\beta(GfP)$                                                                                  |
