# Supplementary material
Source: PubMed Central journal article supplement (PMC356945)

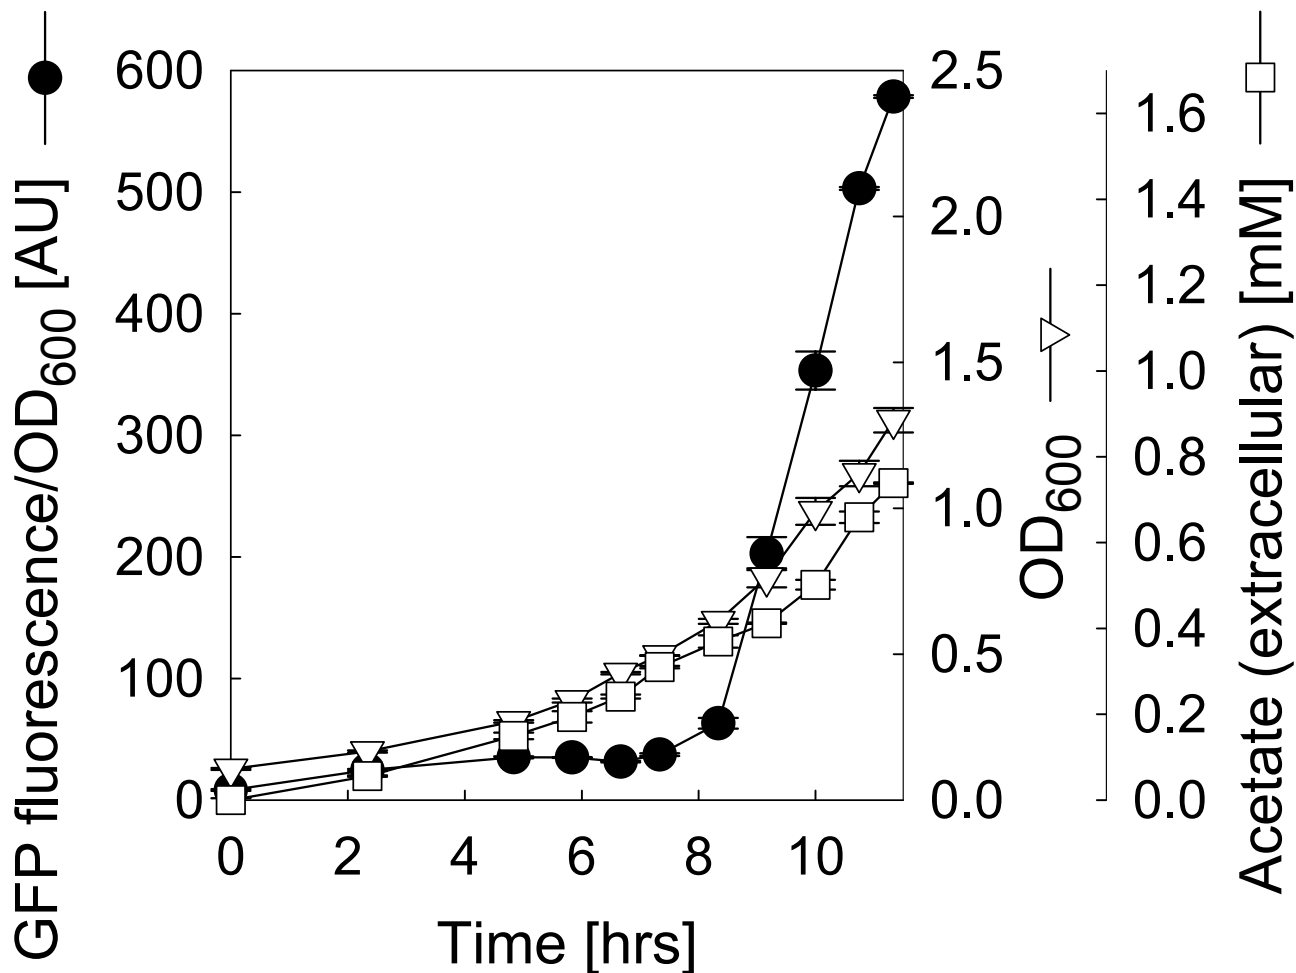

Supplement: pnas_0306484101_2.pdf [file pnas_0306484101_2.pdf]

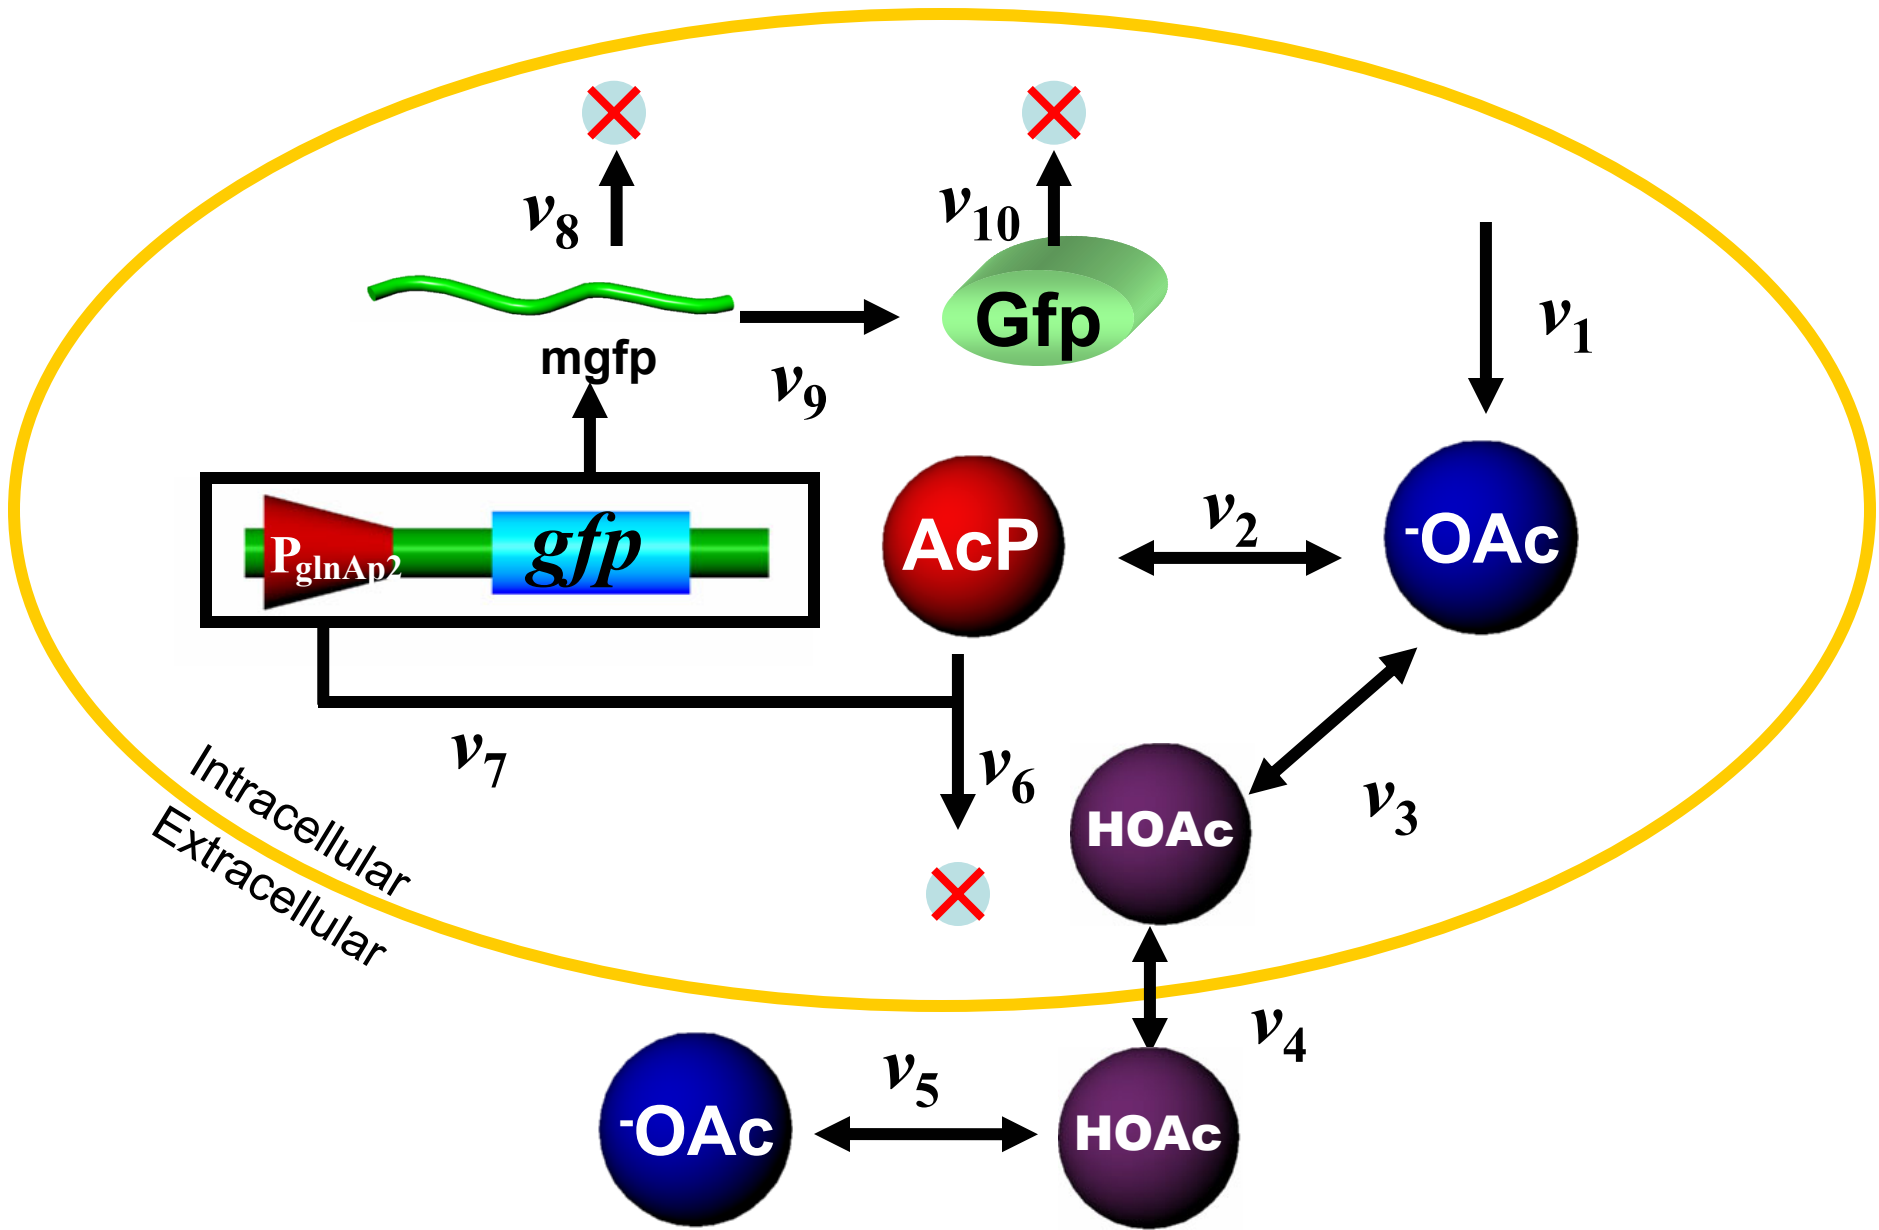

Supplement: pnas_0306484101_5.pdf [file pnas_0306484101_5.pdf]
